# Supplementary material for: GFPuv-Expressing Recombinant Rickettsia typhi: a Useful Tool for the Study of Pathogenesis and CD8+ T Cell Immunology in R. typhi Infection
Source: PubMed Central journal article supplement (PMC5442613; doi:10.1128/iai.00156-17), 2017-05-23
Supplement: IAI.00156-17_zii999092035s1.pdf [file IAI.00156-17_zii999092035s1.pdf]

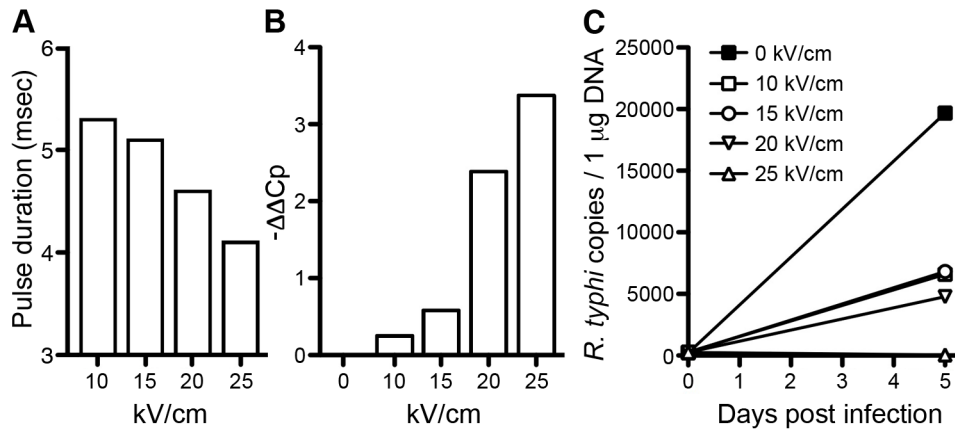

**Fig. S1. Determination of electroporation conditions: Bacterial growth after electroporation and DNase protection assay.** DNA-containing *R. typhi* suspensions were electroporated with indicated field strengths (x-axis). The pulse durations for the different electroporation conditions are depicted (y-axis) (A). To quantify the DNA uptake by the bacteria, extracellular DNA in electroporated samples was digested by DNase I. Copy numbers (Cp) of *R. typhi* and of *GFP* were quantified by qPCR. The  $\Delta\Delta\text{Cp}$  values (y-axis) describe the differences between the Cp values of the *R. typhi*- and *GFP*-specific qPCRs that were normalized to the 0 kV/cm values ( $\Delta\Delta\text{Cp} = \Delta\text{Cp}_{\text{GFP}} - \Delta\text{Cp}_{\text{R. typhi}}$ ) (B). To quantify *R. typhi* survival, L929 cells were infected with the electroporated bacteria. *R. typhi* copy numbers in the cell culture (y-axis) were quantified by *OmpB*-specific qPCR at indicated points in time (x-axis) (C).
